# Supplementary material for: Spin-labeled Diclofenac: Synthesis and Interaction with Lipid Membranes
Source: Preprints.org preprint supplement (doi:10.20944/preprints202307.2088.v1), 2023-07-31
Supplement: Supplementary file 1 [file supplementary]

**Supplementary Materials**

Spin-labeled Diclofenac: Synthesis and Interaction with Lipid Membranes

Denis S. Baranov,1 Anna S. Kashnik,1 Anastasiya N. Atnyukova,2 Sergei A. Dzuba1*

1 Voevodsky Institute of Chemical Kinetics and Combustion, SB RAS, 630090 Novosibirsk, Russian Federation;

2 Department of Physics, Novosibirsk State University, 630090 Novosibirsk, Russian Federation.

* Correspondence: [dzuba@kinetics.nsc.ru](mailto:dzuba@kinetics.nsc.ru))

**Table of Contents**

| **Figure S1.** 1H-NMR spectrum of compound **2** in DMSO-D6……………………….... | S2 |
| --- | --- |
| **Figure S2.** 1H-NMR spectrum of compound **3** in CDCl3……………………………... | S3 |
| **Figure S3.** 13C-NMR spectrum of compound **3** in CDCl3…………………………...... | S3 |
| **Figure S4.** 1H-NMR spectrum of compound **4** in CDCl3……………………………... | S4 |
| **Figure S5.** 13C-NMR spectrum of compound **4** in CDCl3…………………………...... | S4 |
| **Figure S6.** 1H-NMR spectrum of compound **1** in CDCl3……………………………... | S5 |
| **Figure S7.** 1H-NMR spectrum of compound **1** in CDCl3 after one month of storage in the environment……………………………………………………………… | S5 |
| **Figure S8.** 13C-NMR spectrum of compound **1** in CDCl3…………………………….. | S6 |
|  |  |
|  |  |

**Figure S1**. 1H-NMR spectrum of compound **2** in DMSO-D6.

**Figure S2**. 1H-NMR spectrum of compound **3** in CDCl3.

**Figure S3**. 13C-NMR spectrum of compound **3** in CDCl3.

**Figure S4**. 1H-NMR spectrum of compound **4** in CDCl3.

**Figure S5**. 13C-NMR spectrum of compound **4** in CDCl3.

**Figure S6**. 1H-NMR spectrum of compound **1** in CDCl3.

**Figure S7**. 1H-NMR spectrum of compound **1** in CDCl3 after one month of storage in the environment.

**Figure S8**. 13C-NMR spectrum of compound **1** in CDCl3.
